# Supplementary material
Source: PubMed Central journal article supplement (PMC10140071)
Supplement: 41467_2023_38201_MOESM3_ESM.pdf [file 41467_2023_38201_MOESM3_ESM.pdf]

## **Description of Additional Supplementary Files**

File Name: Supplementary Data 1

Description: Summary of BA.1.\* monophyletic clades in Hong Kong.

File Name: Supplementary Data 2

Description: Summary of Delta monophyletic clades in Hong Kong.

File Name: Supplementary Data 3

Description: Summary of BA.2.\* monophyletic clades in Hong Kong.

File Name: Supplementary Data 4

Description: Acknowledgements to sequences obtained from GISAID (assessed on 01-May-2022).
