# Supplementary material
Source: PubMed Central journal article supplement (PMC10140071)
Supplement: 41467_2023_38201_MOESM7_ESM.pdf [file 41467_2023_38201_MOESM7_ESM.pdf]

## SUPPLEMENTAL TABLE

### **Data Availability**

GISAID Identifier: EPI\_SET\_220901sn

doi: [10.55876/gis8.220901sn](https://doi.org/10.55876/gis8.220901sn)

All genome sequences and associated metadata in this dataset are published in GISAID's EpiCoV database. To view the contributors of each individual sequence with details such as accession number, Virus name, Collection date, Originating Lab and Submitting Lab and the list of Authors, visit [10.55876/gis8.220901sn](https://gisaid.org/gis8.220901sn)

### **Data Snapshot**

- EPI\_SET\_220901sn is composed of 8,452 individual genome sequences.
- The collection dates range from 2019-12-26 to 2022-05-01;
- Data were collected in 153 countries and territories;
- All sequences in this dataset are compared relative to hCoV-19/Wuhan/WIV04/2019 (WIV04), the official reference sequence employed by GISAID (EPI\_ISL\_402124). Learn more at <https://gisaid.org/WIV04>.
